1

2

3

4 Using the natural language processing system MedNER-J to analyze pharmaceutical care

5 records

6

7

8 Yukiko Ohno<sup>1</sup>, Riri Kato<sup>1</sup>, Haruki Ishikawa<sup>1</sup>, Tomohiro Nishiyama<sup>2</sup>, Minae Isawa<sup>1</sup>,

9 Mayumi Mochizuki<sup>1</sup>, Eiji Aramaki<sup>2</sup>, Tohru Aomori<sup>1\*</sup>

10

11

12

13 **1** Keio University Faculty of Pharmacy, Tokyo, Japan

14 **2** Nara Institute of Science and Technology, Nara, Japan

15

16 \*Corresponding author

17 E-mail: [aomori-th@pha.keio.ac.jp](mailto:aomori-th@pha.keio.ac.jp) (TA)

18

## 19 **Abstract**

20 Large language models have propelled recent advances in artificial intelligence  
21 technology, facilitating the extraction of medical information from unstructured data such  
22 as medical records. Although named entity recognition (NER) is used to extract data from  
23 physicians' records, it has yet to be widely applied to pharmaceutical care records.

24 In this report, we investigated the feasibility of automatic extraction of patients'  
25 diseases and symptoms from pharmaceutical care records. The verification was  
26 performed using MedNER-J, a Japanese disease-extraction system designed for  
27 physicians' records.

28 MedNER-J was applied to subjective, objective, assessment, and plan data from the  
29 care records of 49 patients who received cefazolin sodium injection at Keio University  
30 Hospital between April 2018 and March 2019. The performance of MedNER-J was  
31 evaluated in terms of precision, recall, and F-measure.

32 The F-measure of NER for subjective, objective, assessment, and plan data was 0.46,  
33 0.70, 0.76, and 0.35, respectively. In NER and positive–negative classification, the F-  
34 measure was 0.28, 0.39, 0.64, and 0.077, respectively. The F-measure of NER for  
35 objective and assessment data (F=0.70, 0.76) was higher than that for subjective and plan  
36 data, which supported the superiority of NER performance for objective and assessment

37 data. This might be because objective and assessment data contained many technical  
38 terms, similar to the training data for MedNER-J. Meanwhile, the F-measure of NER and  
39 positive-negative classification was high for assessment data alone ( $F=0.64$ ), which was  
40 attributed to the similarity of its description format and contents to those of the training  
41 data.

42 MedNER-J successfully read pharmaceutical care records and showed the best  
43 performance for assessment data. However, challenges remain in analyzing records other  
44 than assessment data. Therefore, it will be necessary to reinforce the training data for  
45 subjective data in order to apply the system to pharmaceutical care records.

46

## 47 **Introduction**

48 In recent years, with advancements in artificial intelligence technology, it has become  
49 possible to extract information related to patients' diseases and symptoms from  
50 unstructured data such as medical records [1, 2].

51 Technology to extract information such as diseases and symptoms, the names of  
52 people and organizations, time expressions, and numerical expressions from text is  
53 generally referred to as named entity recognition (NER). Some NER systems also have a  
54 positive–negative (P/N) classification function that can be used to determine the onset of  
55 extracted findings.

56 To date, most research on natural language processing (NLP) technology has focused  
57 on English texts. NLP technology focused on Japanese texts has lagged due to certain  
58 aspects of the Japanese language, including that words are not separated by spaces and  
59 subjects are often omitted [3].

60 Among Japanese NLP studies focused on medical issues, Imai et al. [4] developed a  
61 system that performs extraction and P/N classification of malignant findings from  
62 radiological reports such as CT reports and MRI reports; Ma et al. [5] built a system that  
63 performs extraction and P/N classification of abnormal findings from discharge  
64 summaries, progress notes, and nursery notes; and Aramaki et al. [6] developed a system

65 that performs extraction and P/N classification of disease names and symptoms from case  
66 history summaries. In addition, Mashima et al. [7] extracted adverse events from progress  
67 notes about patients who received intravenous injections of cytotoxic anticancer drugs,  
68 and Usui et al. [8] extracted symptomatic states from data stored in the electronic  
69 medication records of a community pharmacy and standardized them according to the  
70 codes of the International Classification of Diseases, Tenth Revision in order to create a  
71 dataset of patients' complaints. Similar studies have also focused on social media posts  
72 and patients' blogs [9, 10]. The NII Testbeds and Community for Information access  
73 Research Project's "Medical Natural Language Processing for Web Document" task  
74 aimed to classify pseudo-tweets according to whether they contained information about  
75 patients' symptoms, and several teams collaborated to build a system to accomplish this  
76 task. Nishioka et al. established a system to identify from blog posts whether a patient is  
77 positive or negative for hand-foot syndrome on a per-patient and per-sentence basis.  
78 Although various approaches have been taken to analyze unstructured medical-related  
79 data as described above, most have targeted physicians' records, including case history  
80 summaries, discharge summaries, and radiological reports, NER has not been widely  
81 applied to pharmaceutical care records.

82 Pharmaceutical care records are documents about patients written by pharmacists,

83 who collect information from a pharmacological perspective. Because pharmaceutical  
84 care records contain an entry for the change in patients' physical condition while taking  
85 medication, including symptoms of suspected adverse drug effects [11], many such  
86 symptoms are documented in pharmaceutical care records. Thus, realizing an NER  
87 system that can extract and analyze information from pharmaceutical care records would  
88 facilitate investigations of adverse drug effects.

89 The study by Usui et al. [8], mentioned above, targeted data similar to this study.  
90 Because their system was a rule-based model, it had difficulty handling symptoms and  
91 contexts that were not set in the rules. Although rules can be added, it is difficult to  
92 manage them with consistency. Therefore, we aimed to overcome this problem by using  
93 machine learning.

94 In the present study, we applied MedNER-J, a Japanese-language system designed to  
95 extract disease information from physicians' records [6] to pharmaceutical care records  
96 in order to verify the feasibility of NER and P/N classification for this task. Target data  
97 were pharmaceutical care records of patients who received cefazolin sodium (CEZ)  
98 injection. CEZ is a cephem antibiotics that is often used to prevent secondary infection  
99 from operative wounds. The system was applied only to the records of patients who  
100 received CEZ injection, with the expectation of mainly collecting target drug information

101 due to fewer concomitant drugs.

102

## 103 **Materials and methods**

### 104 **Materials**

105 Pharmaceutical care records of patients who received CEZ injection between April 2018  
106 and March 2019 at Keio University Hospital were used as test data (Fig. 1). Researchers  
107 accessed and obtained those data on 19 November 2021.

108

109 **Fig. 1 Dataset preparation.** Among the records from April 2018 to March 2019, those  
110 from the date of first CEZ administration to 12 days after the end of administration that  
111 also contained the keywords in the objective column or the free-text column and a record  
112 in one of SOAP columns were included in the analysis.

113 S, subjective; O, objective; A, assessment; P, plan.

114

115 Pharmaceutical care records were written by pharmacists, and the format consisted  
116 of free-text columns and subjective, objective, assessment, and plan (SOAP) columns:  
117 subjective information such as patients' complaints were included in the subjective data;  
118 objective information such as clinical history, clinical findings, and laboratory data were

119 included in the objective data; assessments by pharmacists were included in the  
120 assessment data; and future plans were included in the plan data.

121 Data that satisfied the following criteria were used in this research: (1) records with  
122 a description in at least one SOAP column, and (2) records including any of the following  
123 key words in the free-text column or objective column: cefazolin (written in full-width or  
124 half-width katakana characters), cefamezin (written in full-width or half-width katakana  
125 characters), CEZ, and cez.

126 MedNER-J was applied to the records that satisfied the above criteria and that  
127 corresponded to the period from first CEZ dosing day to 12 days after the last dosing for  
128 each patient for each month.

129

## 130 **Named Entity Recognition / Positive–Negative Classification**

131 We used MedNER-J [12] for NER and P/N classification (Fig. 2). MedNER-J is an NLP  
132 system that uses case history summaries as training data and uses conditional random  
133 fields [13] based on the feature value of bidirectional encoder representations from  
134 transformers [14] to extract diseases and symptoms from physicians' records. The system  
135 can perform P/N classification in order to determine onset or absence of presumed  
136 findings from the context.



137

138 **Fig. 2 Processing of pharmaceutical care records.** Each SOAP column underwent  
139 preprocessing as well as NER and P/N classification by MedNER-J in order to obtain the  
140 final results.

141 S, subjective; O, objective; A, assessment; P, plan.

142

143 As preprocessing, all characters in the records were converted to full-width characters,  
144 and exclamation marks were converted to periods.

145 Preprocessed records were input to MedNER-J on a sentence-by-sentence basis to  
146 perform NER and P/N classification. A sentence break was defined as a line break or a  
147 period.

148

## 149 **Performance Evaluation**

150 Figure 3 shows the performance evaluation flow. Two researchers independently  
151 extracted named entities from the same records, performed P/N classification by visual  
152 confirmation, and created the correct answer data. Exact and partial matches of extracted  
153 terms between MedNER-J and the two researchers were examined, and P/N classification  
154 matches were also investigated. The criteria the researchers followed to create the correct

155 answer data will be explained in the following section.

156

157 **Fig. 3 Flow of result matching.** The system’s results were matched with the researchers’

158 results, and performance evaluation indexes were calculated based on the number of NER

159 matches alone and the number of NER and P/N classification matches. Both exact

160 matches as well as partial matches were obtained for NER.

161

162 In cases where one sentence contained the same named entities multiple times,

163 researchers also checked whether the positional relationships in the sentence were

164 matched for the same extracted named entities. If the extracted terms matched exactly,

165 they were judged as exact matches. In cases where they did not match exactly but

166 overlapped by one or more Japanese characters, they were judged as partial matches. Both

167 exact match extractions and partial match extractions were checked in terms of P/N

168 classification.

169 Precision, recall, and F-measure were calculated and evaluated for the following:

170 “matches of NER (including partial matches)” and “matches of NER (including partial

171 matches) and P/N classification.”

172

$$173 \quad \textit{Precision} = \frac{\textit{Number of True positive}}{\textit{Number of True positive and False positive}}$$

$$174 \quad \textit{Recall} = \frac{\textit{Number of True positive}}{\textit{Number of True positive and False negative}}$$

$$175 \quad \textit{F - measure} = \frac{2 * \textit{precision} * \textit{recall}}{\textit{precision} + \textit{recall}}$$

176

177       When counting the results, including partial matches, the number of matched terms  
178 varied depending on whether they were counted in units of the researchers' extracted  
179 terms or in units of the system's extracted terms. In such cases, counts were made  
180 according to the units, whichever reduced the total number of matched terms.

181       The validity of researchers' evaluations was examined using kappa coefficients [15].  
182 Mismatched results between two researchers were discussed and judgement results  
183 between researchers were adjusted. The kappa coefficient of the two researchers was 0.87,  
184 indicating a high degree of concordance; this showed that researchers' evaluations were  
185 appropriate.

186       The mismatched results between MedNER-J and the researchers were categorized as  
187 follows: (1) system extraction failure, (2) incorrect extraction by the system, (3)  
188 difference in P/N classification, and (4) difference in the length of extracted terms. The  
189 number of mismatched terms also varied depending on whether they were counted in  
190 units of terms extracted by the system or terms extracted by the researchers. In such cases,

191 counts were made according to units, whichever increased the number of mismatched  
192 terms.

193 After categorization, the features of mismatched terms in each category were  
194 explored, with the aim of understanding what the system is currently incapable of doing  
195 and discussing how those features affect analyses performed by the system.

196

## 197 **Judging Criteria for Researchers**

198 This section outlines the criteria the researchers used to create the correct answer data.  
199 Not only nouns such as “pain,” but also verbs such as “hurt,” adjectives such as “sore,”  
200 and adverbs such as “painfully” were considered targets for extraction. Symptom  
201 modifiers such as site, timing, and severity of symptom onset were also considered  
202 together with the symptoms to be extracted. For “sleep,” “appetite,” “state of bowel  
203 movements,” “renal function,” “hepatic function,” and “blood electrolyte levels,” if only  
204 a statement of normality such as “appetite is fine” was given, it was also considered to be  
205 a target for extraction. For example, pharmacists often ask patients whether or not they  
206 have experienced a loss of appetite, and patients’ responses, such as “appetite is fine,”  
207 were recorded frequently. Such normal states were difficult to consider as diseases or  
208 symptoms. Though targets of extraction for records analysis were diseases and symptoms,

209 they are also considered to be important information about patients. Therefore the six  
210 items mentioned above were considered for extraction by the researchers. English  
211 abbreviations other than laboratory values were consistently excluded from extraction by  
212 the researchers. This is because some of them have different meanings among different  
213 medical departments, and it was difficult to utilize the extracted terms by themselves.  
214 Laboratory values and vital signs were considered for extraction only if words or symbols  
215 clearly stated the numerical change or how it was abnormal, with the exceptions of “renal  
216 function,” “hepatic function,” and “blood electrolyte concentration.” If only numerical  
217 information on laboratory values and vital signs were provided, the information was  
218 excluded from extraction because this information is obtainable from the structured data  
219 of the medical records, and thus there is no need to extract it from the text data. When  
220 symptoms were described consecutively, each symptom was considered as an individual  
221 symptom. For “allergy,” any modifiers that indicate the types of allergies listed in the  
222 medical dictionary for regulatory activities (MedDRA) was also considered for extraction.  
223 For example, if there was a description of “allergy caused by a drug,” this could be  
224 classified as “drug hypersensitivity” in MedDRA. Therefore the modifier “caused by a  
225 drug” was included in the extracted data. In some cases, specific drug names were  
226 mentioned, for example, the description “allergy caused by cefazolin.” However, the drug

227 name “cefazolin” does not appear in MedDRA. If a drug name that does not appear in  
228 MedDRA is included in description, only “allergy” was considered as an extraction target,  
229 any modifiers were excluded. Although the description “medication for diseases (e.g.,  
230 diabetes)” was also included, it was not possible to determine whether the medication was  
231 used for the patient himself/herself. Therefore, “diseases (diabetes)” in “medication for  
232 diseases (diabetes)” was excluded from extraction. “Symptom (e.g., pain)” in “symptom  
233 (pain) monitoring” was excluded from extraction because that symptom could not be  
234 detected in terms of onset or absence.

235 In the P/N classification process, the researchers considered symptoms that were  
236 currently present in the patients themselves as positive symptoms in principle. Onset or  
237 absence of symptoms was determined by referring only to the context within a given  
238 sentence. Usage of medication to be taken as needed, such as “times of pain,” was  
239 regarded as a negative symptom, because onset has not yet occurred. Adverse drug effects  
240 mentioned in the explanation of the drug used were considered to be negative symptoms  
241 because they did not actually occur. Past symptoms that were not stated to have resolved,  
242 such as “I couldn’t sleep last night,” were considered to be positive symptoms. If there  
243 was even a slight improvement in symptoms, they were considered to be negative  
244 symptoms. Other cases in which the onset of symptoms could not be determined were

245 considered to be positive symptoms.

246

## 247 **Ethical considerations**

248 This study was approved by the ethics committee of the Keio University School of

249 Medicine (approval No. 2020067). The researchers used only record data that have been

250 previously de-identified by removing patient names and replacing real patient IDs with

251 dummy IDs. Only the personal information manager, who was not included in the authors,

252 had access to the correspondence table between the real patient ID and the dummy ID.

253 The opt-out in written form was implemented instead of informed consent. The opt-out

254 document is available from:

255 <http://www.hosp.keio.ac.jp/annai/shinryo/pharmacy/oshirase/>.

256

## 257 **Results**

258 Of the 15,327 records of patients who received CEZ injection during the 2018 fiscal year,

259 a total of 317 pharmaceutical care records satisfied both inclusion criteria (Fig. 1). The

260 number of records obtained within the period following CEZ injection were 43 for

261 subjective data (38 patients), 60 for objective data (49 patients), 54 for assessment data

262 (45 patients), and 56 for plan data (46 patients). The number of extracted terms from each

263 SOAP dataset was 50 from subjective data, 411 from objective data, 135 from assessment  
264 data, and 37 from plan data by MedNER-J, and 130 from subjective data, 444 from  
265 objective data, 216 from assessment data, and 15 from plan data by the two researchers  
266 (Table 1). The number of matched extractions, including partial matches between the  
267 system and the researchers, was 41 in subjective data, 300 in objective data, 133 in  
268 assessment data, and 9 in plan data (Table 1).

269

270 **Table 1. Number of the records analyzed and extraction results by the MedNER-J**

271 **system and researchers**

|                                                          | <b>S data</b> | <b>O data</b> | <b>A data</b> | <b>P data</b> |
|----------------------------------------------------------|---------------|---------------|---------------|---------------|
| Number of records analyzed                               | 43            | 60            | 54            | 56            |
| Number of extracted terms by the system                  | 50            | 411           | 135           | 37            |
| Number of extracted terms by researchers                 | 130           | 444           | 216           | 15            |
| Number of matches (NER) <sup>a</sup>                     | 41            | 300           | 133           | 9             |
| Number of matches (NER <sup>a</sup> +P/N classification) | 25            | 165           | 113           | 2             |

272 S, subjective; O, objective; A, assessment; P, plan.

273 <sup>a</sup> **including partial matches**

274

275 The number of terms, for which NER was exactly or partially matched and P/N



276 classification was matched, was 25 for subjective data, 165 for objective data, 113 for  
277 assessment data, and 2 for plan data (Table 1).

278 Table 2 shows the results of the performance evaluation. The precision of NER  
279 (including partial matches) was 0.76, 0.82, 0.73, 0.99, and 0.24 for all data, subjective  
280 data, objective data, assessment data, and plan data, respectively. The recall of NER  
281 (including partial matches) was 0.60, 0.32, 0.68, 0.62, and 0.60 respectively. In NER  
282 (including partial matches) and P/N classification, precision was 0.48, 0.50, 0.40, 0.84,  
283 and 0.054, and recall was 0.38, 0.19, 0.37, 0.52, and 0.13 for all data, subjective data,  
284 objective data, assessment data, and plan data, respectively. The recall of subjective and  
285 assessment data was lower than precision for both NER alone and for NER and P/N  
286 classification. Precision was higher than recall for plan data. Recall was similar to  
287 precision for objective data.

288

289 **Table 2. Performance evaluation of NER and P/N classification**

|                                                      | Precision | Recall | F-measure |
|------------------------------------------------------|-----------|--------|-----------|
| NER (including partial matches)                      |           |        |           |
| All data                                             | 0.76      | 0.60   | 0.67      |
| S data                                               | 0.82      | 0.32   | 0.46      |
| O data                                               | 0.73      | 0.68   | 0.70      |
| A data                                               | 0.99      | 0.62   | 0.76      |
| P data                                               | 0.24      | 0.60   | 0.35      |
| NER (including partial matches) + P/N classification |           |        |           |

|          |       |      |       |
|----------|-------|------|-------|
| All data | 0.48  | 0.38 | 0.42  |
| S data   | 0.50  | 0.19 | 0.28  |
| O data   | 0.40  | 0.37 | 0.39  |
| A data   | 0.84  | 0.52 | 0.64  |
| P data   | 0.054 | 0.13 | 0.077 |

290 S, subjective; O, objective; A, assessment; P, plan.

291

292 A trade-off relationship exists between precision and recall, meaning that when one  
293 increases, the other decreases. Therefore, the F-measure, which is the harmonic mean of  
294 precision and recall, is used as an evaluation index for overall performance. The F-  
295 measure of NER alone (including partial matches) was 0.67, 0.46, 0.70, 0.76, and 0.35,  
296 while that for NER (including partial matches) and P/N classification was 0.42, 0.28, 0.39,  
297 0.64, and 0.077 for all data, subjective data, objective data, assessment data, and plan data,  
298 respectively. These results show that MedNER-J was able to conduct NER and P/N  
299 classification with high performance in the order of assessment data, objective data,  
300 subjective data, and plan data. Table 3 shows the categories of causes of mismatches  
301 between the system and the researchers.

302

303 **Table 3. Percentage of mismatched terms in the total number of extracted terms <sup>a</sup>**  
304 **and the number of mismatched terms in each cause category**

| Cause category | S data | O data | A data | P data |
|----------------|--------|--------|--------|--------|
|----------------|--------|--------|--------|--------|

|                                                        | [n (%)]   | [n (%)]    | [n (%)]   | [n (%)]   |
|--------------------------------------------------------|-----------|------------|-----------|-----------|
| Total number of extracted terms <sup>b</sup>           | 139       | 555        | 218       | 43        |
| <b>(1) system extraction failure</b>                   | 89 (64.0) | 139 (25.0) | 83 (38.1) | 5 (11.6)  |
| <b>(2) incorrect extraction by the system</b>          | 9 (6.47)  | 111 (20.0) | 2 (0.900) | 28 (65.1) |
| <b>(3) difference in P/N classification</b>            | 16 (11.5) | 138 (24.9) | 20 (9.20) | 8 (18.6)  |
| <b>(4) difference in the length of extracted terms</b> | 13 (9.35) | 81 (14.6)  | 30 (13.8) | 2 (4.7)   |

305 S, subjective; O, objective; A, assessment; P, plan.

306 <sup>b</sup> *Total number of extracted terms =*

307 *the number of extracted terms by the system +*

308 *the number of extracted terms by researchers –*

309 *the number of matched terms between the system and researchers (exact matches and partial match*

310

311 Because each type of SOAP data contained differing amounts of information about

312 diseases and symptoms, a comparison of mismatch causes among these data should be

313 based on the percentage of mismatched terms among the total extracted terms (the sum

314 of the number of extracted terms by the system and the researchers minus the number of

315 matched terms), not the number of mismatched terms. In the calculation of this percentage,

316 partial matches were considered matches in cause categories (1) through (3), while partial  
317 matches were considered mismatches in cause category (4). For this reason, the  
318 percentage of cause categories (1) through (4) does not add up to 100%. Comparing the  
319 percentages, the largest percentage of mismatches was subjective data (64.0%) in cause  
320 category (1), plan data (65.1%) in cause category (2), objective data (24.9%) in cause  
321 category (3), and objective data (14.6%) in cause category (4).

322 The researchers classified terms in the four cause categories shown in Table 3 into  
323 subcategories according to the features of the mismatched term itself and the context  
324 around the mismatched term. If a mismatched term had multiple features, it was counted  
325 in more than one subcategory.

326 The subjective and assessment data were expected to contain a large amount of  
327 adverse drug effect information due to the characteristics of the SOAP format. The  
328 researchers focused on subjective and assessment data because they expected that the  
329 analysis of pharmaceutical care records would facilitate the collection and analysis of  
330 information on adverse drug effects. Given that the performance for subjective data was  
331 low, we listed in Fig. 4 the top five subcategories that had the highest number of eligible  
332 cases in cause category (1) with the highest percentage of mismatches in the subjective  
333 data.

334

335 **Fig. 4 Example breakdown of cause category (1) “system extraction failure.”** English

336 translations of the original Japanese texts in the pharmaceutical care records are shown in

337 example. Shading in the example text indicates the scope of the researchers’ extraction.

338 S, subjective; O, objective; A, assessment; P, plan.

339

340 The common mismatches in cause category (1) “system extraction failure” were

341 “verbs, adjectives, and adverbs,” “expressions that are difficult to grasp as diseases or

342 symptoms,” and “lists of dosages (medication to be taken as needed) (e.g., times of the

343 symptoms).” The most common mismatches in the subjective data were “verbs, adjectives,

344 and adverbs.”

345 In mismatches of “verbs, adjectives, and adverbs,” many expressions were general

346 terms or colloquialisms that could be included in the patients’ speech, such as “sore” and

347 “I couldn’t sleep.” The mismatches of “expressions that are difficult to grasp as diseases

348 or symptoms” corresponded to expressions such as “bowel movements are fine.”

349 Although they characterized a normal status, they were important for understanding the

350 patient’s health status. “Lists of dosages (medication to be taken as needed) (e.g., times

351 of the symptoms)” was a description of the dosage of medication to be taken as needed.

352

## 353 **Discussion**

### 354 **Principal results**

355 Our results showed that when MedNER-J was applied to pharmaceutical care records,  
356 NER and P/N classification could successfully be performed. However, the performance  
357 of the system differed for each type of SOAP data, and some issues remain for practical  
358 utilization. Furthermore, cases in which the system performed inadequately were  
359 identified by analysis of mismatch cause categories.

360

### 361 **Application to Pharmaceutical Care Records**

362 The number of extracted terms by both the system and the researchers were larger in the  
363 order of objective, assessment, subjective, and plan data. The number of extracted terms  
364 by the researchers from each type of SOAP data was 130, 444, 216, and 15 terms,  
365 respectively. Furthermore, 41, 300, 133, and 9 terms respectively matched with NER  
366 alone (including partial matches) between the system and the researchers. Meanwhile, 25,  
367 165, 113, and 2 terms matched with NER (including partial matches) and P/N  
368 classification by the system and the researchers.

369 The pharmaceutical care records that were targeted in this study included an average

370 of 13.4 diseases or symptoms per record. From these records, MedNER-J correctly  
371 extracted an average of 8.1 terms or correctly extracted and performed P/N classification  
372 on an average of 5.1 terms. Therefore, MedNER-J was able to extract 60.4% of findings  
373 from the pharmaceutical care records and correctly classify 63.0% of those findings as  
374 positive or negative.

375

## 376 **Performance evaluation**

377 In this study, we focused on results that included not only exact matches but also partial  
378 matches between MedNER-J and the researchers. Word segments in Japanese are unclear,  
379 and the necessary extraction range of words varies depending on the situation and the  
380 reader. As an example of variations, for the term *itakute* (“in pain”), it is sufficient to  
381 extract *itaku* or it may be necessary to extract *itakute*, including the conjunctive particle  
382 *te*. In addition, we considered whether expressions related to severity should also be  
383 extracted. We speculated that enough information would be extracted from partial  
384 matches to ascertain diseases and symptoms. Therefore we decided to analyze results  
385 including partial matches.

386 Although the F-measure for all data was 0.67 for NER alone, and 0.42 for NER and  
387 P/N classification, values varied among the subjective, objective, assessment, and plan

388 data. This variation indicates that the applicability of the system differs for each dataset.  
389 The F-measure of NER for the objective and assessment data was high (F=0.70, 0.76),  
390 while that of NER for the subjective and plan data was only 0.46 and 0.35, respectively.  
391 This indicates that the NER performance for the objective and assessment data was  
392 superior to that for the subjective and plan data. At the same time, the F-measure of NER  
393 and P/N classification was high only for assessment data (F=0.64).

394 The training data for MedNER-J consisted of case history summaries. Because  
395 machine-learning systems are generally optimized for the analysis of the training data,  
396 the system was optimized for the analysis of case history summaries. Case history  
397 summaries include chief complaints, medical history, laboratory findings, and discussions  
398 of each case, as summarized by physicians. Thus, in case history summaries, unlike the  
399 pharmaceutical care records written in the SOAP format, the patients' raw statements in  
400 the subjective data could have been replaced by the physicians' expressions. In addition,  
401 the plan data used in this study contained only 15 terms of symptoms, and many records  
402 ended with brief descriptions such as "observe the progress." These points are considered  
403 to differ from case history summaries, which describe follow-up plan along with the  
404 discussion. This might have resulted in lower performance for the subjective and plan  
405 data. In contrast, the objective and assessment data were written in the pharmacists'



406 expressions and described diseases and symptoms in technical terminology, which likely  
407 contributed to the high NER performance. Moreover, “progress and discussion of the  
408 disease” are a requisite part of case history summaries [16], and this point was similar to  
409 the description of the assessment data. This is probably why the F-measure including P/N  
410 classification for the assessment data was high. A decrease in recall implies an increase  
411 in false negatives, while a decrease in precision implies an increase in false positives.  
412 Therefore, the lower recall than precision for the subjective and assessment data indicate  
413 that many mismatches were due to cause category (1) “system extraction failure” in Table  
414 3. In contrast, the lower recall than precision in the plan data indicate that cause category  
415 (2), which are incorrect extractions by the system, was more common. In the objective  
416 data, recall showed similar values to precision, which means that false positives and false  
417 negatives occurred equally without bias.

418

## 419 **Mismatch Cause Subcategories**

420 This section discusses possible failures when the system is used in practice for analysis  
421 of pharmaceutical care records, based on the features frequently observed in the cause  
422 subcategories. The discussion here focuses on cause category (1), which was the most  
423 common cause of mismatches for subjective data. Fig. 4 shows typical examples of cause

424 category (1), which was further divided into 17 subcategories, including “verbs,  
425 adjectives, and adverbs,” “expressions that are difficult to grasp as diseases or symptoms,”  
426 “lists of dosages (medication to be taken as needed),” “linguistic representation of  
427 laboratory values,” and “item names.”

428 In cause category (1) “system extraction failure,” many extracted terms are  
429 categorized as “verbs, adjectives, adverbs” or “expressions that are difficult to grasp as  
430 diseases or symptoms.” In “verbs, adjectives, adverbs,” the system was not supposed to  
431 extract general terms, such as “sore,” used by patients. The pharmacist receives the  
432 patients’ complaints and clinical information and then describes the patient’s condition  
433 and other information in objective and assessment columns, replacing them with technical  
434 terminology. However, the system’s inability to extract “verbs, adjectives, and adverbs”  
435 might cause the pharmacists to overlook symptoms that they did not consider important.  
436 Examples of mismatches for extracted terms in the subcategory “expressions that are  
437 difficult to grasp as diseases or symptoms” are terms that are related to the disease state  
438 but do not directly indicate the disease state, including normal appetite, sleep, bowel  
439 movements, renal function, hepatic function, and blood electrolyte levels (Fig. 4). Such  
440 normal findings might be missed due to the system’s inability to extract them. One  
441 limitation of investigations involving medical records is inability to determine the actual

442 occurrence of symptoms that are not explicitly documented in the medical records. The  
443 extraction of normal findings is also important because information that “status of  
444 symptoms was documented but they did not occur” is expected to increase the reliability  
445 of the results of medical record investigation.

446

## 447 **Future tasks**

448 Not only for cause category (1) but for the other cause categories as well, the cause of the  
449 mismatches between the system and the researchers can be explained by one of the  
450 following two factors: the training data for the system did not contain similar expressions,  
451 or there was a difference between the criteria the system had learned and the criteria the  
452 researchers used in this study. Using the analysis target for which performance is expected  
453 to be improved as training data should improve the performance of the system. From a  
454 medical safety standpoint, overlooking patients’ information is highly detrimental.  
455 Therefore, a high recall is preferable, even if precision decreases somewhat. However,  
456 recall was significantly lower than precision for the subjective data (precision=0.82,  
457 recall=0.32). Therefore, it is critical to improve recall for the subjective data going  
458 forward.

459 Although the SOAP format used in pharmaceutical care records has been the focus

460 of this study, records are sometimes written in SOAP format by other medical staff,  
461 including physicians. Among those records, we referred to the subjective data in  
462 pharmaceutical care records because of the differences in the kind of attention paid to  
463 patients' changes in clinical state depending on the profession. For example, physicians  
464 follow up with patients extensively from disease diagnosis to treatment. Nurses provide  
465 not only treatment but also daily care for patients during their hospitalization. In contrast,  
466 pharmacists conduct follow-up with patients from a pharmacological perspective, which  
467 inevitably includes asking about the beneficial and adverse effects of medications.  
468 Therefore, it can be inferred that the descriptions contained in the subjective data of  
469 pharmaceutical care records differs from those contained in the subjective data of records  
470 by other medical staff, despite the fact they are both subjective data. Consequently, to  
471 implement a system that can also analyze pharmaceutical care records, it is imperative to  
472 study the subjective data of pharmaceutical care records rather than those of other medical  
473 staff.

474

## 475 **Limitation**

476 A limitation of this study is the small sample size, consisting only of patients who received  
477 CEZ injection at a single institution. When the system is applied to data from different

478 facilities or data of patients who used different drugs different results might be obtained  
479 due to differences in recording formats, adverse drug effect profiles, characterizations of  
480 the patients' chief complaints, and the perspectives of the health care providers.

481

## 482 **Future Utilization**

483 The possibilities for the use of NER in healthcare are broad and varied, as shown by the  
484 various efforts undertaken in previous studies [4-10]. Because pharmaceutical care  
485 records contain a large amount of information on adverse drug effects, it should be  
486 possible to alert healthcare professionals when symptoms of possible adverse drug  
487 reactions are extracted with reference to the attached document information. Although  
488 medical safety must always be ensured in clinical practice, there is a limit to what can be  
489 undertaken due to limited human resources and heavy workloads. However, MedNER-J  
490 is expected to help medical staff avoid overlooking patients' symptoms and thereby  
491 improve medical safety. Another possibility is to use the results obtained from analyzing  
492 large records to investigate the frequency of adverse drug effects or to discover unknown  
493 adverse drug effects based on real-world data. New discoveries might be obtained from  
494 analyzing large amounts of data that were previously unavailable.

495

## 496 **Conclusions**

497 MedNER-J, a system designed to extract information from physicians' records, was  
498 applied to extract data from pharmaceutical care records. The system showed high  
499 performance for assessment data, was less reliable for other types of SOAP data. Our  
500 results suggest that to more effectively apply the system to pharmaceutical care records,  
501 the amount of training data needs to be increased to focus mainly on subjective data,  
502 which includes patients' complaints.

503

## 504 **References**

- 505 1. Aramaki E, Wakamiya S, Yada S, Nakamura Y. Natural Language Processing: from  
506 Bedside to Everywhere. *Yearb Med Inform.* 2022 Aug;31(1):243-253. doi:  
507 10.1055/s-0042-1742510. Epub 2022 Jun 2. PMID: 35654422; PMCID:  
508 PMC9719781.
- 509 2. Dreisbach C, Koleck TA, Bourne PE, Bakken S. A systematic review of natural  
510 language processing and text mining of symptoms from electronic patient-authored  
511 text data. *Int J Med Inform.* 2019 May;125:37-46. doi:  
512 10.1016/j.ijmedinf.2019.02.008. Epub 2019 Feb 20. PMID: 30914179; PMCID:  
513 PMC6438188.
- 514 3. Katsuki M, Narita N, Matsumori Y, Ishida N, Watanabe O, Cai S, et al. Preliminary  
515 development of a deep learning-based automated primary headache diagnosis model  
516 using Japanese natural language processing of medical questionnaire. *Surg Neurol*  
517 *Int.* 2020 Dec 29;11:475. Doi: 10.25259/SNI\_827\_2020. PMID: 33500813; PMCID:  
518 PMC7827501.
- 519 4. Imai T, Aramaki E, Kajino M, Miyo K, Onogi Y, Ohe K. Finding malignant findings  
520 from radiological reports using medical attributes and syntactic information. *Stud*  
521 *Health Technol Inform.* 2007;129(Pt 1):540-4. PMID: 17911775.

- 522 5. Ma X, Imai T, Shinohara E, Sakurai R, Kozaki K, Ohe K. A Semi-Automatic  
523 Framework to Identify Abnormal States in EHR Narratives. *Stud Health Technol*  
524 *Inform.* 2017;245:910-914. PMID: 29295232.
- 525 6. Aramaki E, Yano K, Wakamiya S. MedEx/J: A One-Scan Simple and Fast NLP Tool  
526 for Japanese Clinical Texts. *Stud Health Technol Inform.* 2017;245:285-288. PMID:  
527 29295100.
- 528 7. Mashima Y, Tamura T, Kunikata J, Tada S, Yamada A, Tanigawa M, et al. Using  
529 Natural Language Processing Techniques to Detect Adverse Events From Progress  
530 Notes Due to Chemotherapy. *Cancer Inform.* 2022 Mar 22;21:11769351221085064.  
531 doi: 10.1177/11769351221085064. PMID: 35342285; PMCID: PMC8943584.
- 532 8. Usui M, Aramaki E, Iwao T, Wakamiya S, Sakamoto T, Mochizuki M. Extraction and  
533 Standardization of Patient Complaints from Electronic Medication Histories for  
534 Pharmacovigilance: Natural Language Processing Analysis in Japanese. *JMIR Med*  
535 *Inform.* 2018 Sep 27;6(3):e11021. doi: 10.2196/11021. PMID: 30262450; PMCID:  
536 PMC6231790.
- 537 9. Wakamiya S, Morita M, Kano Y, Ohkuma T, Aramaki E. Tweet Classification Toward  
538 Twitter-Based Disease Surveillance: New Data, Methods, and Evaluations. *J Med*  
539 *Internet Res.* 2019 Feb 20;21(2):e12783. doi: 10.2196/12783. PMID: 30785407;



- 540           PMCID: PMC6401666.
- 541    10. Nishioka S, Watanabe T, Asano M, Yamamoto T, Kawakami K, Yada S, et al.
- 542           Identification of hand-foot syndrome from cancer patients' blog posts: BERT-based
- 543           deep-learning approach to detect potential adverse drug reaction symptoms. PLoS
- 544           One. 2022 May 4;17(5):e0267901. doi: 10.1371/journal.pone.0267901. PMID:
- 545           35507636; PMCID: PMC9067685.
- 546    11. Ministry of Health, Labour and Welfare; [cited 2022 Dec 27]. Available from:
- 547           <https://www.mhlw.go.jp/content/001075622.pdf>.
- 548    12. MedNER-J [Internet]. Ujiie S, Yata S; [cited 2022 Dec 27]. Available from:
- 549           <https://github.com/sociocom/MedNER-J>.
- 550    13. Lafferty J, McCallum A, Pereira F. Conditional random fields: Probabilistic models
- 551           for segmenting and labeling sequence data. ICML. 2001: 282-289.
- 552    14. Devlin J, Chang MW, Lee K, Toutanova K. BERT: Pre-training of Deep Bidirectional
- 553           Transformers for Language Understanding. NAACL-HLT. 2019: 4171-4186.
- 554    15. Cohen, J. (1960). A Coefficient of Agreement for Nominal Scales. Educational and
- 555           Psychological Measurement. 1960; 20(1): 37–46.
- 556    16. The Japanese Society of Internal Medicine; [cited 2023 Jan 23]. Available from:
- 557           [https://www.naika.or.jp/wp-content/uploads/J-OSLER/Tebiki\\_ByorekiHyoka.pdf](https://www.naika.or.jp/wp-content/uploads/J-OSLER/Tebiki_ByorekiHyoka.pdf).

Pharmaceutical  
care records

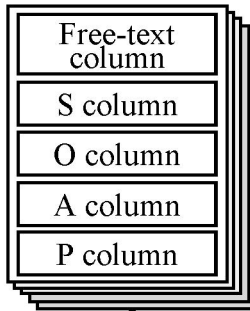

Records of patients who had a  
CEZ dosing history during  
fiscal year 2018  
N = 15327

O columns or free-text  
columns include key words  
n =1857

Record in at least one of  
SOAP columns  
Total: 317  
S data 286, O data 317,  
A data 309, P data 311

Records from the date of  
the first dose to 12 days after the  
last dose of CEZ  
for each month  
Total 60  
S data 43 / O data 60  
A data 54 / P data 56

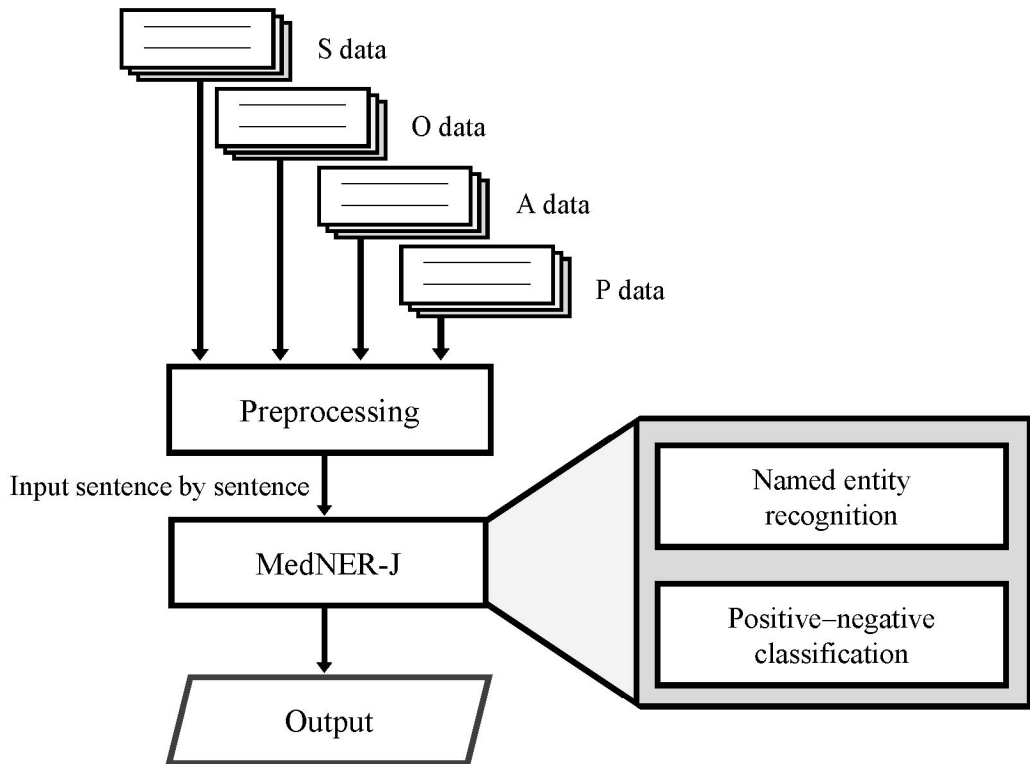

Raw text (An English translation of the original Japanese text)

- Pain during movement appears to have increased after Epi removal.

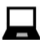

The system was applied to the text data

Positive  
Pain

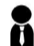

The researchers checked the text data visually

Positive  
Pain during movement

Matching of the results

Pain Positive  
Pain during movement Positive

Matching of NER

0 Exact Match

1 Partial Match  
(Match more than 1 Japanese character)

Matching of P/N classification

Not detected

1 Match

NER (only exact matches)  
+ P/N classification

NER (including partial matches)  
+ P/N classification

| subcategory                                                                   | S data (n) | O data (n) | A data (n) | P data (n) | example                                                                                                                                                                                                                            |
|-------------------------------------------------------------------------------|------------|------------|------------|------------|------------------------------------------------------------------------------------------------------------------------------------------------------------------------------------------------------------------------------------|
| Verbs, adjectives, and adverbs                                                | 50         | 23         | 13         | 0          | Still hurts.<br>Although he didn't take Belsomra last night, he couldn't sleep.<br>Also, kidney function is poor and drug dosage needs to be carefully monitored                                                                   |
| Expressions that are difficult to grasp as diseases or symptoms               | 8          | 4          | 20         | 0          | <ul style="list-style-type: none"> <li>• Kidney function and liver function are fine.</li> <li>• Electrolytes are fine.</li> </ul> I have no trouble sleeping now.<br>I have a bowel movement once a day, so I think I'm doing OK. |
| Lists of dosages (medication to be taken as needed) (e.g., times of symptoms) | 0          | 20         | 0          | 0          | Rozerem (8 mg) 1 T time of insomnia up to once a day<br>Check pain control status → In times of pain, respond with medications as appropriate<br>Usage: refer to the instruction manual (time of pain)                             |
| Linguistic representation of laboratory values                                | 0          | 9          | 17         | 0          | <ul style="list-style-type: none"> <li>• INR is short</li> </ul> Decreasing trends in WBC and CRP were observed.<br>From L/D, the potassium level, which was high on admission, decreased to normal.                               |
| Item names                                                                    | 0          | 13         | 0          | 0          | < Adverse drug effects ><br>Adverse drug effects : Allergy, impaired liver function, cold sweat<br>Adverse drug effects) Possibility of adverse drug effects such as anaphylactic shock, skin symptoms, and digestive symptoms     |
